# Supplementary material for: MetaGxData: Clinically Annotated Breast, Ovarian and Pancreatic Cancer Datasets and their Use in Generating a Multi-Cancer Gene Signature
Source: PubMed Central journal article supplement (PMC6584731; doi:10.1038/s41598-019-45165-4), 2019-06-19
Supplement: 41598_2019_45165_MOESM1_ESM.pdf [file 41598_2019_45165_MOESM1_ESM.pdf]

# SUPPLEMENTARY INFORMATION

## MetaGxData: Clinically Annotated Breast, Ovarian and Pancreatic Cancer Datasets and their Use in Generating a Multi-Cancer Gene Signature

Deena M.A. Gendoo<sup>1+\*</sup>, Michael Zon<sup>2,4+</sup>, Vandana Sandhu<sup>2</sup>, Venkata SK Manem<sup>2,3,5</sup>, Natchar Ratanasirigulchai<sup>2</sup>, Gregory M Chen<sup>2</sup>, Levi Waldron<sup>6\*‡</sup>, Benjamin Haibe-Kains<sup>2,3,7,8,9\*‡</sup>

<sup>1</sup> Centre for Computational Biology, Institute of Cancer and Genomic Sciences, University of Birmingham, Birmingham, United Kingdom

<sup>2</sup> Princess Margaret Cancer Center, University Health Network, Toronto, M5G 2C1, Canada

<sup>3</sup> Department of Medical Biophysics, University of Toronto, Toronto, M5S 3H7, Canada

<sup>4</sup> Department of Biomedical Engineering, McMaster University, Toronto, L8S 4L8, Canada

<sup>5</sup> Institut Universitaire de Cardiologie et de Pneumologie de Québec, Université Laval, G1V 4G5, Canada

<sup>6</sup> Graduate School of Public Health and Health Policy, Institute of Implementation Science in Population Health, City University of New York School, New York, 11101, USA

<sup>7</sup> Department of Computer Science, University of Toronto, Toronto, M5T 3A1, Canada

<sup>8</sup> Ontario Institute of Cancer Research, Toronto, M5G 0A3, Canada

<sup>9</sup> Vector Institute, Toronto, M5G 1M1, Canada

+ These authors contributed equally to this work

‡ Co-senior authors

\* Corresponding authors

\* Correspondence to: [d.gendoo@bham.ac.uk](mailto:d.gendoo@bham.ac.uk) [DMAG], [levi.waldron@hunter.cuny.edu](mailto:levi.waldron@hunter.cuny.edu) [LW], and [benjamin.haibe.kains@utoronto.ca](mailto:benjamin.haibe.kains@utoronto.ca) [BHK]

## Supplementary Information

**Supplementary File S1.** Explanation of curated clinical annotations (phenotype data variables) in MetaGxBreast (A), MetaGxOvarian (B), and MetaGxPancreas (C).

**Supplementary Figure S2.** Heatmap representation of clinical variables availability across gene expression datasets of MetaGxBreast, MetaGxOvarian, and MetaGxPancreas. Datasets are represented as rows and clinical variables as columns. The percentage of samples in each dataset that is annotated with a particular variable is represented.

**Supplementary Figure S3.** Schematic representation of the clinical variables (pData) that are available across gene expression datasets in MetaGxBreast. The Stacked bar plots indicate the percentage of samples in every dataset annotated with a particular variable designation. Continuous numeric values are represented by box plots.

**Supplementary Figure S4.** Schematic representation of the clinical variables (pData) that are available across gene expression datasets in MetaGxOvarian. The Stacked bar plots indicate the percentage of samples in every dataset annotated with a particular variable designation. Continuous numeric values are represented by box plots.

**Supplementary Figure S5.** Schematic representation of the clinical variables (pData) that are available across gene expression datasets in MetaGxPancreas. The Stacked bar plots indicate the percentage of samples in every dataset annotated with a particular variable designation. Continuous numeric values are represented by box plots.

**Supplementary File S6. (A)** A Venn diagram of significant genes (FDR<5%) in breast and ovarian cancers, following calculation of the Hazards Ratio is indicated (top). A total of 695 and 654 significantly prognostic genes were identified for ovarian and breast cancer, respectively. Common significant genes between both tumour types (n=30) were further subdivided by their log hazard ratio, for each tumour type. Genes for which elevated expression levels are prognostic (HR>1) across both tumours, or genes for which down-regulated expression is prognostic (HR<1) are indicated. **(B)** A list of the computed Hazard Ratio of all genes, using MetaGxBreast, MetaGxOvarian, and MetaGxPancreas is provided.

**Supplementary Figure S7.** Survival curves for the metaGx, mammaprint signature, and oncoType signature in the ER-/HER2- breast cancer patients stratified by molecular subtypes. The asterisks above the D indices indicate whether the D index was statistically significant ( $p < 0.05$ ).

**Supplementary File S8.** Information pertaining to the genes comprising each of the pancreatic signatures tested against the MetaGx signature. Additional information is also provided in Table2.

**Supplementary Figure S9.** Correlation between MetaGx signature risk prediction scores and their gene module scores.

**Supplementary Figure S10.** Density plots comparing the prognostic value of the gene signature in breast, ovarian, and pancreatic cancer to 1000 random signatures of the same length. The dashed line represents the location of the D index of the signature.

**Supplementary Table S11.** Breast cancer dataset information. The 'patients' column indicates the total number of subjects in each study.

**Supplementary Table S12.** Ovarian cancer dataset information. The 'patients' column indicates the total number of subjects in each study.

**Supplementary Table S13.** Pancreatic cancer dataset information. The 'patients' column indicates the total number of subjects in each study.

## Supplementary Figures

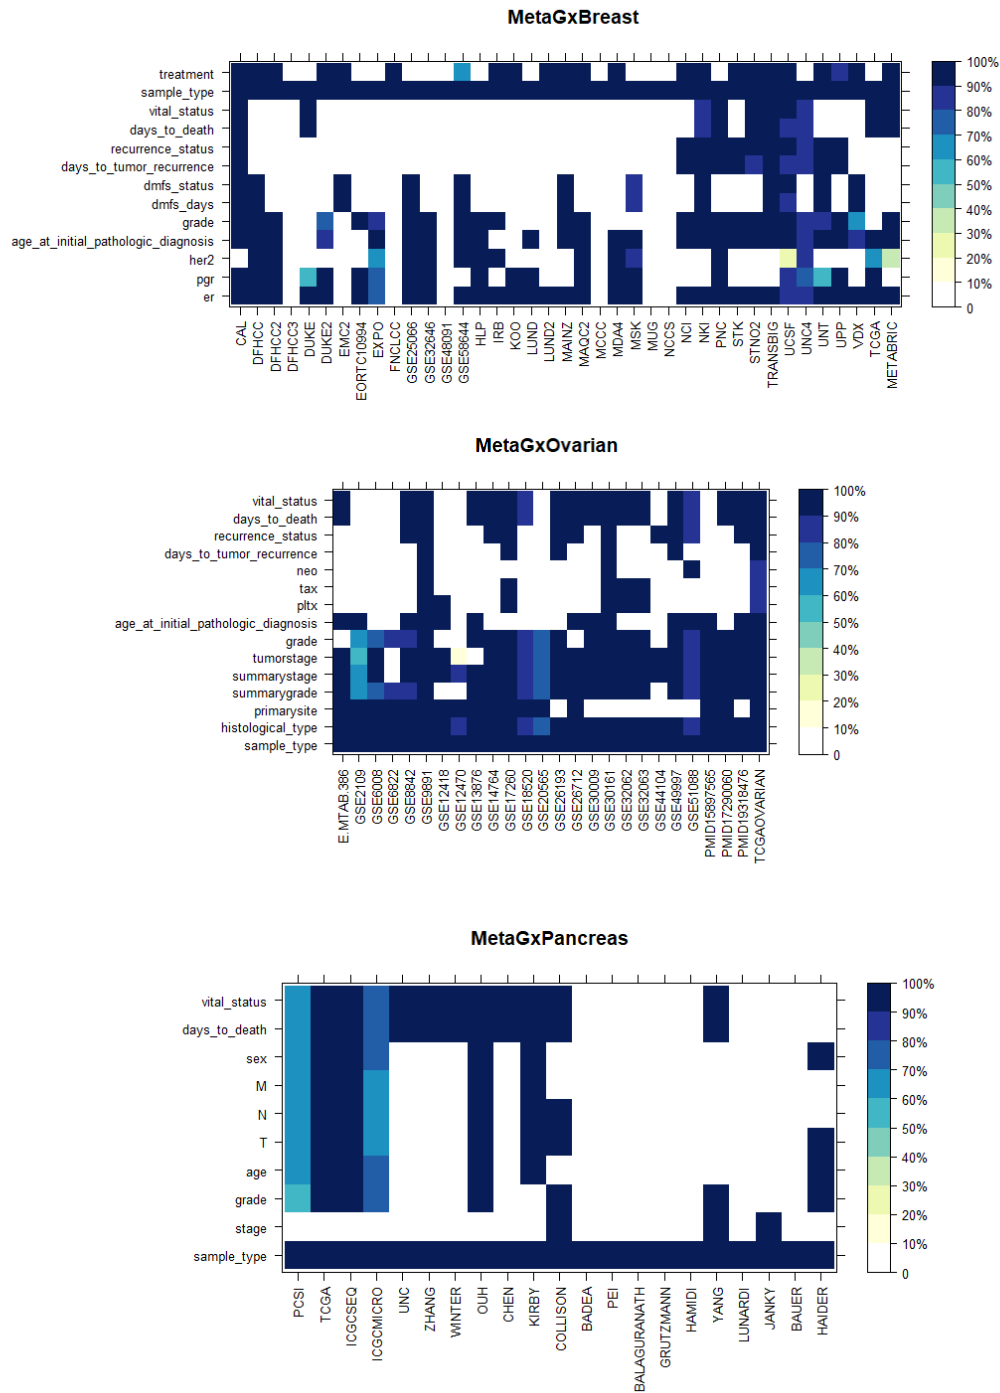

Supplementary Figure S2: Heatmap representation of clinical variables availability across gene expression datasets of MetaGxBreast, MetaGxOvarian, and MetaGxPancreas. Datasets are represented as rows and clinical variables as columns. The percentage of samples in each dataset that is annotated with a particular variable is represented.

# MetaGxBreast

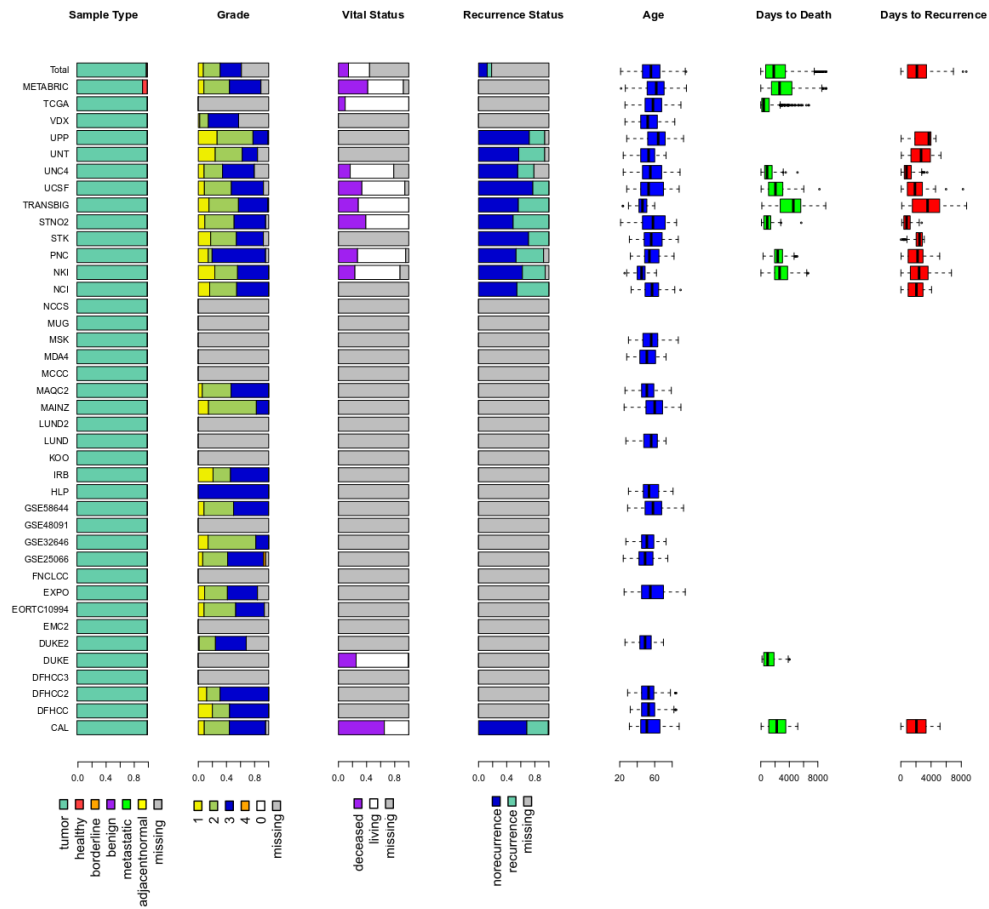

Supplementary Figure S3: Schematic representation of the clinical variables (pData) that are available across gene expression datasets in MetaGxBreast. The Stacked bar plots indicate the percentage of samples in every dataset annotated with a particular variable designation. Continuous numeric values are represented by box plots.

# MetaGxOvarian

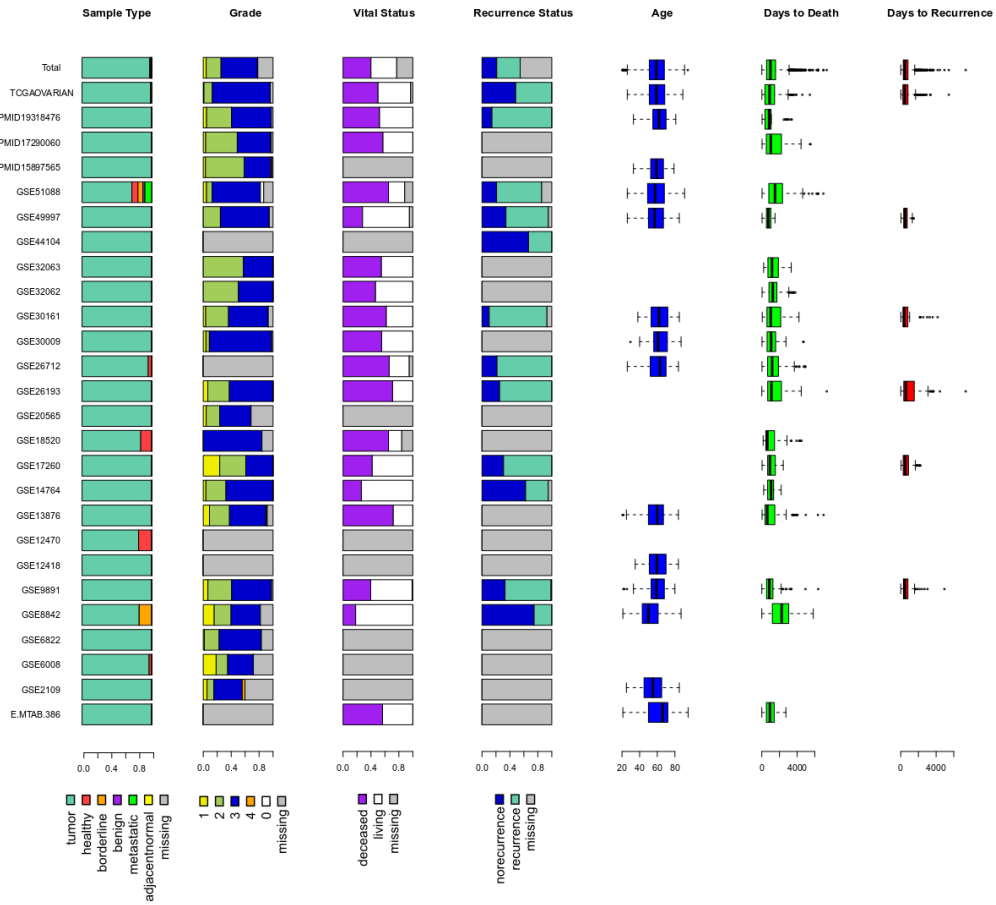

Supplementary Figure S4: Schematic representation of the clinical variables (pData) that are available across gene expression datasets in MetaGxOvarian. The Stacked bar plots indicate the percentage of samples in every dataset annotated with a particular variable designation. Continuous numeric values are represented by box plots.

# MetaGxPancreas

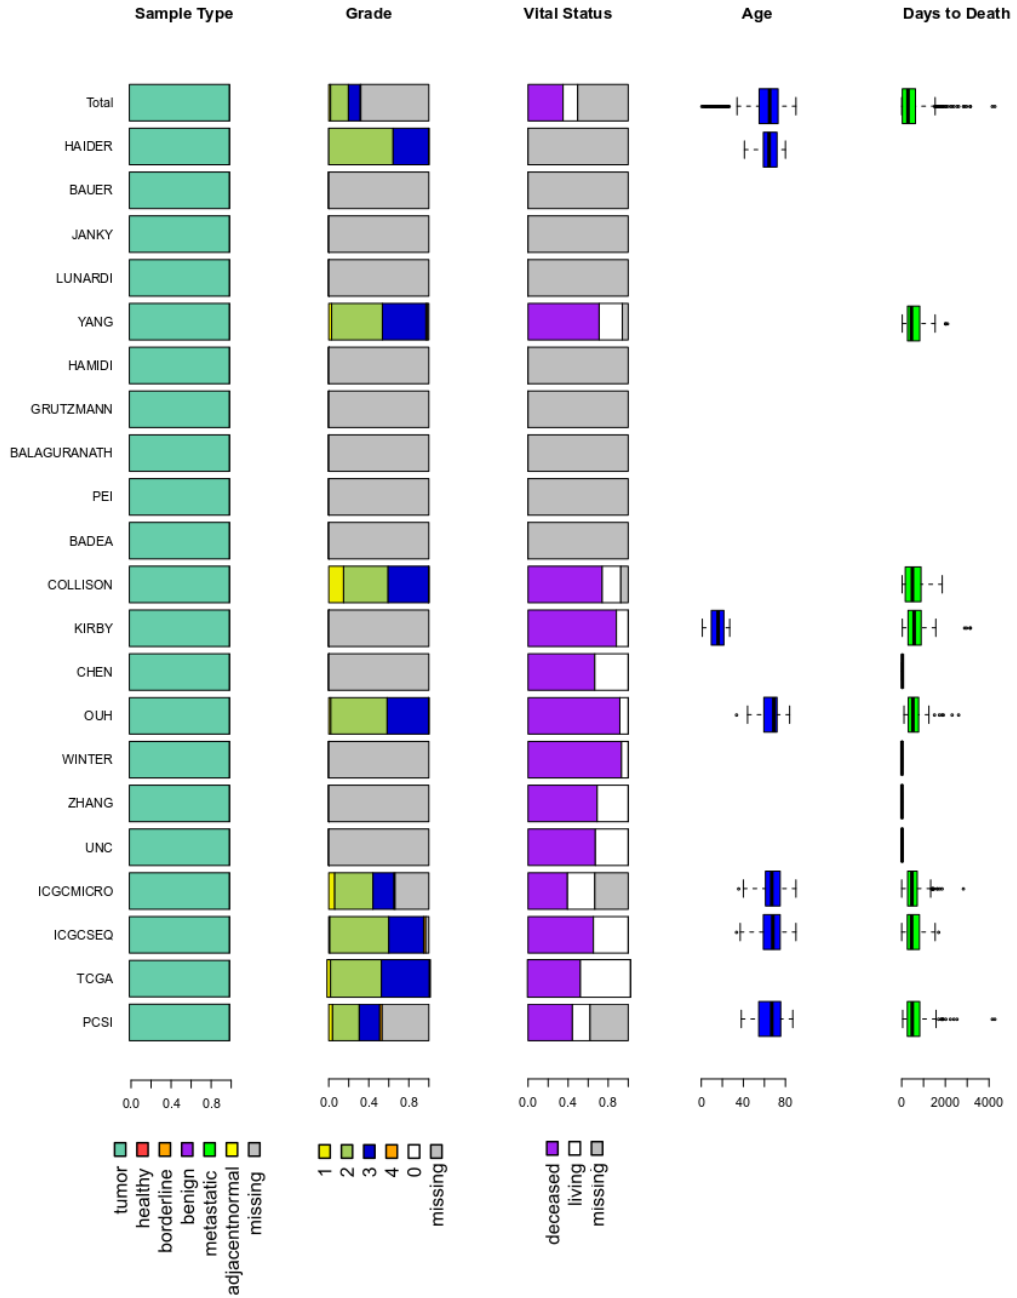

Supplementary Figure S5: Schematic representation of the clinical variables (pData) that are available across gene expression datasets in MetaGxPancreas. The Stacked bar plots indicate the percentage of samples in every dataset annotated with a particular variable designation. Continuous numeric values are represented by box plots.

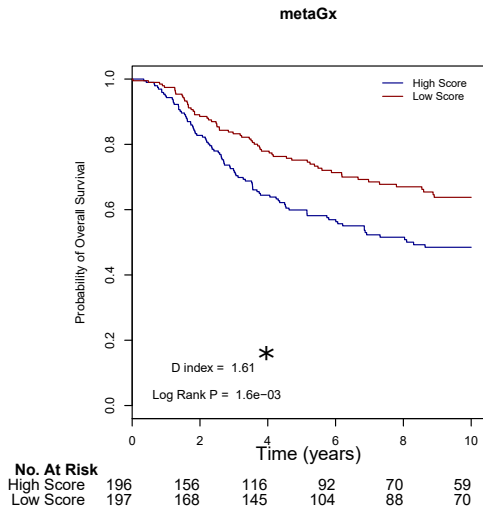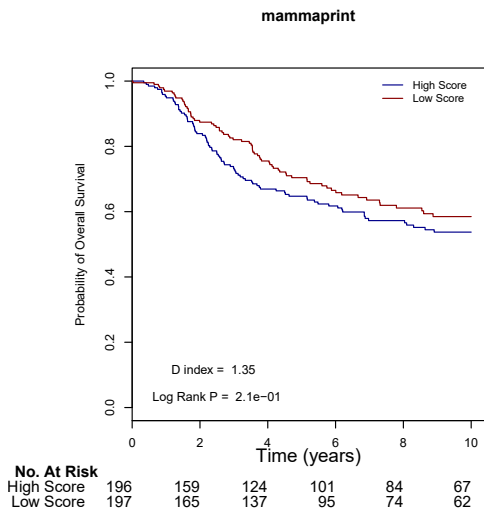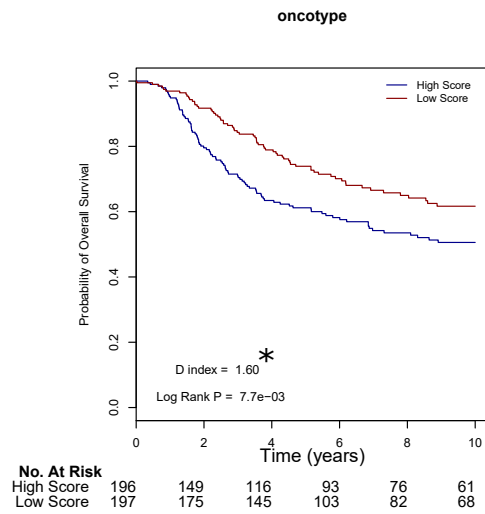

Supplementary Figure S7: Survival curves for the metaGx, mammaprint signature, and oncotype signature in the ER-/HER2- breast cancer patients stratified by molecular subtypes. The asterisks above the D indices indicate whether the D index was statistically significant ( $p < 0.05$ ).



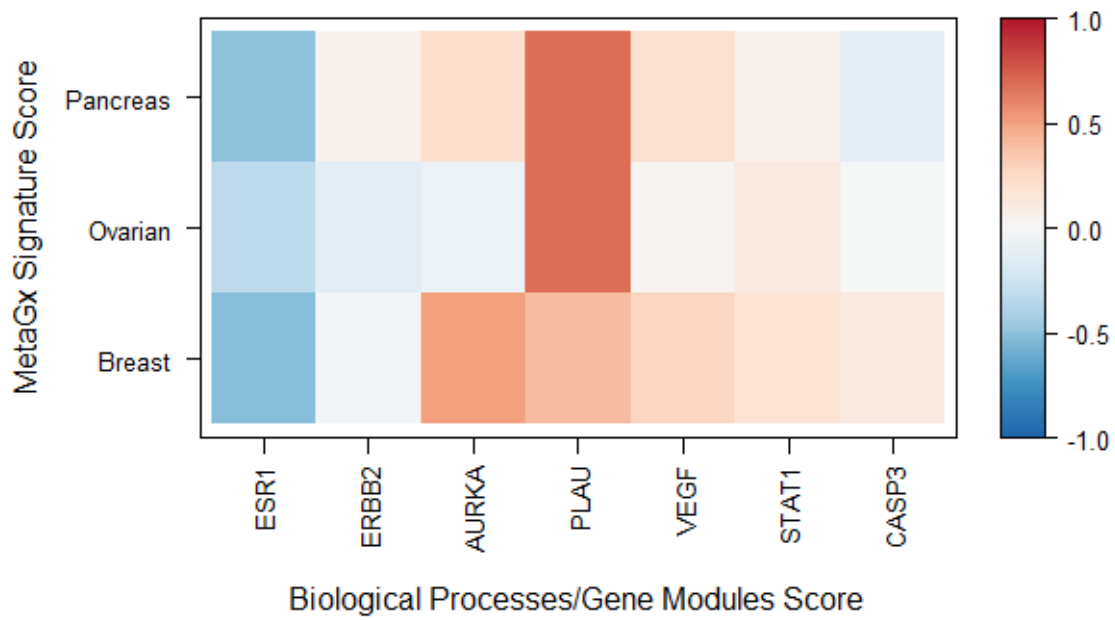

Supplementary Figure S9: Correlation between the patients MetaGx signature risk prediction scores and their gene module scores.

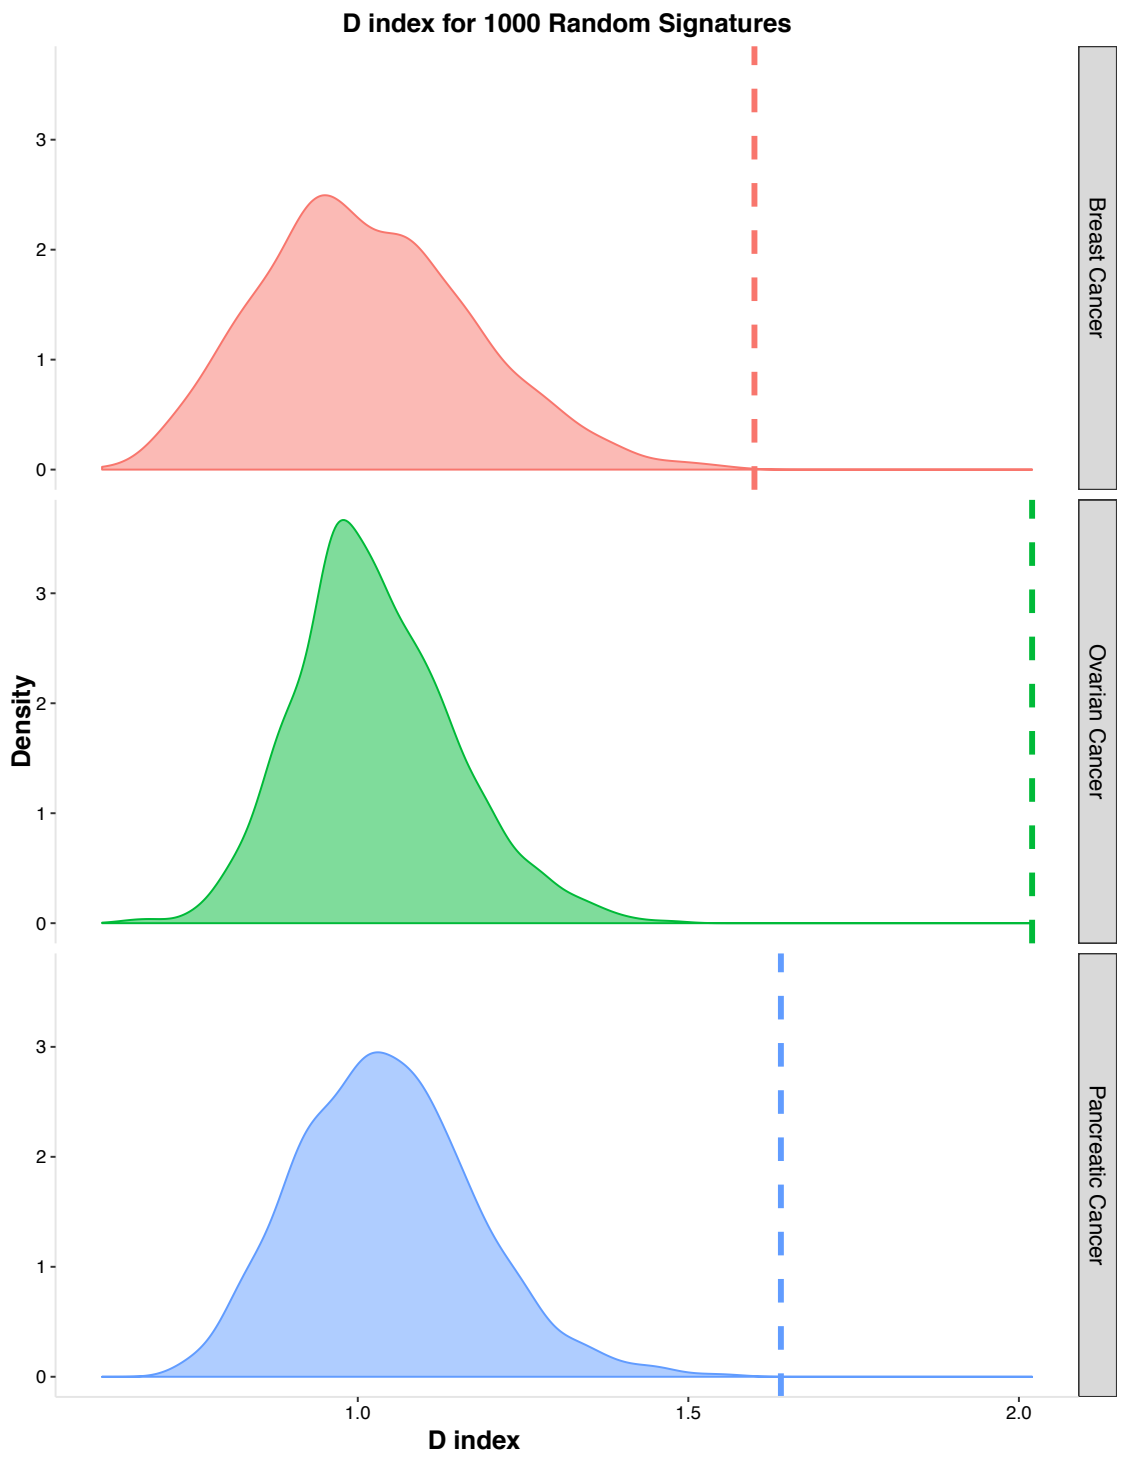

Supplementary Figure S10: Density plots comparing the prognostic value of the gene signature in breast, ovarian, and pancreatic cancer to 1000 random signatures of the same length. The dashed line represents the location of the D index of the signature.

## Supplementary Tables

|    | Dataset     | PMID     | Accession            | Platform                   | Sample Prep | Patients | Probes | Genes |
|----|-------------|----------|----------------------|----------------------------|-------------|----------|--------|-------|
| 1  | CAL         | 17157792 | E-TABM-158           | Affymetrix HGU             | FF          | 118      | 21169  | 13266 |
| 2  | DFHCC       | 20098429 | GSE19615             | GPL570                     | FF          | 115      | 42447  | 21024 |
| 3  | DFHCC2      | 20100965 | GSE18864             | GPL570                     | FF          | 84       | 42447  | 21024 |
| 4  | DFHCC3      | 16473279 | GSE3744              | GPL570                     | FF          | 40       | 42447  | 21024 |
| 5  | DUKE        | 16273092 | GSE3143              | GPL8300                    | FF          | 171      | 12085  | 9103  |
| 6  | DUKE2       | 18024211 | GSE6861              | GPL1352                    | FF          | 160      | 45490  | 20989 |
| 7  | EMC2        | 19421193 | GSE12276             | GPL570                     | FF          | 204      | 42447  | 21024 |
| 8  | EORTC 10994 | 15897907 | GSE1561              | GPL96                      | FF          | 49       | 20967  | 13209 |
| 9  | EXPO        | NA       | GSE2109              | GPL570                     | NA          | 353      | 42447  | 21024 |
| 10 | FNCLCC      | 17659439 | GSE7017              | GPL4819                    | FF          | 150      | 6064   | 5109  |
| 11 | HLP         | 19688261 | E-TABM-543           | Illumina                   | FF          | 53       | 26536  | 19451 |
| 12 | IRB         | 18297396 | GSE5460              | GPL570                     | FF          | 129      | 42447  | 21024 |
| 13 | KOO         | 12747878 | Authors' website     | Affymetrix HGU95           | NA          | 88       | 280    | 258   |
| 14 | LUND        | 18430221 | GSE31863             | GPL14374                   | FF          | 143      | 11154  | 10513 |
| 15 | LUND2       | 17452630 | GSE5325              | GPL3883                    | FF          | 105      | 22008  | 12676 |
| 16 | MAINZ       | 18593943 | GSE11121             | GPL96                      | FF          | 200      | 20967  | 13209 |
| 17 | MAQC2       | 20064235 | GSE20194             | GPL96///GPL570///GPL1261   | NA          | 230      | 20967  | 13209 |
| 18 | MCCC        | 19960244 | GSE19177             | GPL6106                    | FF          | 75       | 19048  | 14959 |
| 19 | MDA4        | 16896004 | MDACC DB             | Affymetrix HGU             | NA          | 129      | 21169  | 13266 |
| 20 | MSK         | 16049480 | GSE2603              | GPL96                      | FF          | 99       | 20967  | 13209 |
| 21 | MUG         | 18592372 | GSE10510             | GPL6486                    | FF          | 152      | 14288  | 10721 |
| 22 | NCCS        | 18636107 | GSE5364              | GPL96                      | FF          | 183      | 20967  | 13209 |
| 23 | NCI         | 12917485 | Authors' website     | In-house cDNA              | NA          | 99       | 5154   | 4112  |
| 24 | NKI         | 12490681 | Rosetta Inpharmatics | Agilent                    | FF          | 337      | 14960  | 13120 |
| 25 | PNC         | 21910250 | GSE20711             | GPL570                     | FF          | 92       | 42447  | 21024 |
| 26 | STK         | 16280042 | GSE1456              | GPL97///GPL96              | FF          | 159      | 36178  | 19092 |
| 27 | STNO2       | 12829800 | GSE4382              | GPL180///GPL2776///GPL2777 | FF          | 118      | 3663   | 3230  |
| 28 | TRANSBIG    | 17545524 | GSE7390              | GPL96                      | FF          | 198      | 20967  | 13209 |
| 29 | UCSF        | 17428335 | Authors' website     | In-house cDNA              | FF          | 162      | 8015   | 6279  |
| 30 | UNC4        | 20813035 | GSE18229             | GPL885///GPL887///GPL1390  | FF          | 305      | 5420   | 5026  |
| 31 | UNT         | 16478745 | GSE2990              | Affymetrix HGU             | FF          | 133      | 36084  | 18821 |
| 32 | UPP         | 16141321 | GSE3494              | GPL570                     | FF          | 251      | 36178  | 19092 |
| 33 | VDX         | 17420468 | GSE2034              | Affymetrix HGU             | FF          | 344      | 21169  | 13266 |
| 34 | METABRIC    | 22522925 | EGAS0000 0000083     | METABRIC                   | FF          | 2136     | 36155  | 24924 |
| 35 | TCGA        | 23000897 | TCGA Website         | TCGA                       | FF          | 1073     | 19504  | 19408 |
| 36 | GSE25066    | 21558518 | GSE25066             | GPL96                      | FF          | 508      | 20967  | 13209 |
| 37 | GSE32646    | 22320227 | GSE32646             | GPL570                     | FF          | 115      | 42437  | 21024 |
| 38 | GSE58644    | 25284793 | GSE58644             | GPL6244                    | FF          | 321      | 21462  | 20202 |
| 39 | GSE48091    | 26077471 | GSE48091             | GPL10379                   | FF          | 623      | 23246  | 12917 |

Supplementary Table S11: Breast cancer dataset information. The 'patients' column indicates the total number of subjects in each study.

|    | Dataset      | PMID     | Accession    | Platform                   | Sample Prep | Patients | Probes | Genes |
|----|--------------|----------|--------------|----------------------------|-------------|----------|--------|-------|
| 1  | E.MTAB.386   | 22348002 | E.MTAB.386   | GPL6104                    | FFPE        | 129      | 12449  | 10572 |
| 2  | GSE12418     | 16996261 | GSE12418     | GPL5886                    | FF          | 54       | 11304  | 10559 |
| 3  | GSE12470     | 19486012 | GSE12470     | GPL887                     | FF          | 53       | 15999  | 13717 |
| 4  | GSE13876     | 19192944 | GSE13876     | GPL7759                    | FF          | 157      | 20939  | 13894 |
| 5  | GSE14764     | 19294737 | GSE14764     | GPL96                      | FF          | 80       | 20967  | 13209 |
| 6  | GSE17260     | 20300634 | GSE17260     | GPL6480                    | FF          | 110      | 30936  | 19596 |
| 7  | GSE18520     | 19962670 | GSE18520     | GPL570                     | FF          | 63       | 42447  | 21024 |
| 8  | GSE20565     | 20492709 | GSE20565     | GPL570///GPL2005///GPL6801 | FF          | 140      | 42447  | 21024 |
| 9  | GSE2109      | NA       | GSE2109      | GPL570                     | NA          | 204      | 42447  | 21024 |
| 10 | GSE26193     | 22101765 | GSE26193     | GPL570                     | FF          | 107      | 42447  | 21024 |
| 11 | GSE26712     | 18593951 | GSE26712     | GPL96                      | FF          | 195      | 20967  | 13209 |
| 12 | GSE30009     | 22492981 | GSE30009     | GPL13728                   | FF          | 103      | 363    | 363   |
| 13 | GSE30161     | 22348014 | GSE30161     | GPL570                     | FFPE        | 58       | 42447  | 21024 |
| 14 | GSE32062     | 22241791 | GSE32062     | GPL570///GPL6480           | FF          | 260      | 30936  | 19596 |
| 15 | GSE32063     | 22241791 | GSE32063     | GPL6480                    | FF          | 40       | 30936  | 19596 |
| 16 | GSE44104     | 23934190 | GSE44104     | GPL570                     | FF          | 60       | 42447  | 21024 |
| 17 | GSE49997     | 22497737 | GSE49997     | GPL2986                    | FF          | 204      | 18439  | 16760 |
| 18 | GSE51088     | 24368280 | GSE51088     | GPL7264                    | FF          | 172      | 18703  | 16747 |
| 19 | GSE6008      | 17418409 | GSE6008      | GPL96                      | FF          | 103      | 20967  | 13209 |
| 20 | GSE6822      | NA       | GSE6822      | GPL80                      | NA          | 66       | 6407   | 5581  |
| 21 | GSE8842      | 19047114 | GSE8842      | GPL5689                    | FF          | 83       | 7809   | 6250  |
| 22 | GSE9891      | 18698038 | GSE9891      | GPL570                     | FF          | 285      | 42447  | 21024 |
| 23 | PMID15897565 | 15897565 | PMID15897565 | GPL96                      | FF          | 63       | 20967  | 13209 |
| 24 | PMID17290060 | 17290060 | PMID17290060 | GPL96                      | FF          | 117      | 20967  | 13209 |
| 25 | PMID19318476 | 19318476 | PMID19318476 | GPL96                      | FF          | 42       | 20967  | 13209 |
| 26 | TCGAOVARIAN  | NA       | TCGA         | GPL4685                    | FF          | 578      | 21260  | 13224 |

Supplementary Table S12: Ovarian cancer dataset information. The 'patients' column indicates the total number of subjects in each study.

|    | Dataset      | PMID     | Accession   | Platform                                                                                                            | Sample Prep | Patients | Probes | Genes |
|----|--------------|----------|-------------|---------------------------------------------------------------------------------------------------------------------|-------------|----------|--------|-------|
| 1  | BADEA        | 19260470 | GSE15471    | Affymetrix Human Genome U133 Plus 2.0 Array                                                                         | FF          | 39       | 20590  | 20316 |
| 2  | BALAGURANATH | 18765825 | GSE11838    | Human 1A Microarray G4110A-G4110B                                                                                   | FFPE        | 28       | 15254  | 15115 |
| 3  | CHEN         | 26247463 | GSE57495    | Affymetrix,Rosetta-Merck RSTA Custom 2.0                                                                            | FF          | 63       | 22115  | 18207 |
| 4  | COLLISON     | 21460848 | GSE17891    | Affymetrix, array U133 Plus 2.0                                                                                     | FFPE        | 27       | 22408  | 21711 |
| 5  | GRUTZMANN    | 15548371 | E.MEXP.950  | Affymetrix GeneChip Human Genome HG-U133B                                                                           | FF          | 11       | 19926  | 19265 |
| 6  | ICGCSEQ      | 21436628 | icgc.org    | Illumina HumanHT-12 V4.0 expression beadchip                                                                        | FF          | 95       | 15965  | 15602 |
| 7  | ICGCMICRO    | 21436628 | icgc.org    | Illumina HiSeq 2000-2500                                                                                            | FF          | 267      | 21701  | 21375 |
| 8  | KIRBY        | 27282075 | GSE79670    | Illumina, RNA sequencing HiSeq                                                                                      | FF          | 51       | 26264  | 25276 |
| 9  | OUH          | 25579086 | GSE60980    | Agilent-028004 SurePrint G3 Human GE 8x60K Microarray                                                               | FF          | 48       | 32664  | 17991 |
| 10 | PCSI         | NA       | NA          | Illumina HiSeq 2000-2500                                                                                            | FF          | 210      | 58682  | 34941 |
| 11 | PEI          | 19732725 | GSE16515    | Affymetrix Human Genome U133 Plus 2.0 Array                                                                         | FF          | 36       | 22434  | 21353 |
| 12 | TCGA         | NA       | TCGA-PAAD   | IlluminaHiSeq_RNASeqV2                                                                                              | FF          | 146      | 20501  | 17948 |
| 13 | UNC          | 26343385 | GSE71729    | Agilent-014850 Whole Human Genome Microarray 4x44K G4112F Agilent-014850 Whole Human Genome Microarray 4x44K G4112F | FF          | 125      | 19751  | 16074 |
| 14 | WINTER       | 22615549 | E.MEXP.2780 | A-AFFY-44-Affymetrix GeneChip Human Genome U133 Plus 2.0 [HG-U133_Plus_2]                                           | FF          | 30       | 22408  | 21711 |
| 15 | ZHANG        | 22363658 | GSE28735    | Affymetrix GeneChip Human Gene 1.0 ST arrays                                                                        | FF          | 42       | 24215  | 23220 |
| 16 | HAMIDI       | NA       | GSE77858    | Agilent-012097 Human 1A Microarray (V2) G4110B                                                                      | FF          | 46       | 16898  | 16898 |
| 17 | YANG         | 27197190 | GSE62452    | Affymetrix GeneChip Human Gene 1.0 ST                                                                               | FF          | 69       | 23306  | 22213 |
| 18 | LUNARDI      | 25415223 | GSE55643    | Agilent-014850 Whole Human Genome Microarray 4x44K G4112F                                                           | FF          | 45       | 19595  | 17231 |
| 19 | JANKY        | 27520560 | GSE62165    | Affymetrix Human Genome U219 Array                                                                                  | FF          | 118      | 20395  | 20395 |
| 20 | BAUER        | 27578530 | E-MTAB-1791 | Illumina human WG6 Expression BeadChip                                                                              | FF          | 195      | 19936  | 19936 |
| 21 | HAIDER       | 28592875 | GSE56560    | Affymetrix Human Exon 1.0 ST Array                                                                                  | FF          | 28       | 17803  | 15999 |

Supplementary Table S13: Pancreas cancer dataset information. The 'patients' column indicates the total number of subjects in each study.

# Supplementary File S1

## Curated Clinical Annotations in MetaGxBreast

| col.name                            | var.class   | uniqueness | requiredness | allowedvalues                           | description                                                                                                                                                                                                         |
|-------------------------------------|-------------|------------|--------------|-----------------------------------------|---------------------------------------------------------------------------------------------------------------------------------------------------------------------------------------------------------------------|
| sample_name                         | character   | unique     | required     | *                                       | primary sample identifier                                                                                                                                                                                           |
| alt_sample_name                     | character   | unique     | optional     | *                                       | if another identifier is used, for example in supplemental tables                                                                                                                                                   |
| unique_patient_ID                   | character   | non-unique | optional     | *                                       | Use this column if there are technical replicates. If this column contains non-unique entries, expression values of those arrays will eventually be averaged.                                                       |
| sample_type                         | character   | non-unique | optional     | tumor metastatic healthy adjacentnormal | healthy should be only from individuals without cancer, metastatic for non-primary tumors                                                                                                                           |
| er                                  | character   | non-unique | optional     | positive negative                       | Estrogen Receptor status                                                                                                                                                                                            |
| pgr                                 | character   | non-unique | optional     | positive negative                       | Progesterone Receptor status                                                                                                                                                                                        |
| her2                                | character   | non-unique | optional     | positive negative                       | HER2 status                                                                                                                                                                                                         |
| tumor_size                          | decimalonly | non-unique | optional     | decimal                                 | tumor size in centimeters                                                                                                                                                                                           |
| T                                   | integer     | non-unique | optional     | 1 2 3 4                                 | T (1-4): size in TNM staging: see <a href="http://www.cancer.gov/cancertopics/pdq/treatment/breast/healthprofessional/page3">http://www.cancer.gov/cancertopics/pdq/treatment/breast/healthprofessional/page3</a> . |
| N                                   | integer     | non-unique | optional     | 0 1                                     | N (0/1): spread to regional lymph nodes no/yes                                                                                                                                                                      |
| age_at_initial_pathologic_diagnosis | numeric     | non-unique | optional     | decimal                                 | age at initial pathologic diagnosis                                                                                                                                                                                 |
| grade                               | integer     | non-unique | optional     | 1 2 3                                   | Taken directly from Haibe-Kains paper, PMID 22262870                                                                                                                                                                |

|                          |           |            |          |                                                                                    |                                                                                                  |
|--------------------------|-----------|------------|----------|------------------------------------------------------------------------------------|--------------------------------------------------------------------------------------------------|
| dmfs_days                | numeric   | non-unique | optional | decimal                                                                            | Potentially censored number of days from diagnosis to distant metastasis or death (dmfs).        |
| dmfs_status              | character | non-unique | optional | norecurrence   recurrence                                                          | Distant metastasis-free survival (dmfs) censoring variable.                                      |
| days_to_tumor_recurrence | integer   | non-unique | optional | decimal                                                                            | This is a potentially censored time from diagnosis to recurrence (rfs).                          |
| recurrence_status        | character | non-unique | optional | norecurrence   recurrence                                                          | recurrence (rfs) status censoring variable                                                       |
| days_to_death            | integer   | non-unique | optional | decimal                                                                            | This is a potentially censored time from diagnosis to death.                                     |
| vital_status             | character | non-unique | optional | living   deceased                                                                  | overall survival censoring variable                                                              |
| tissue                   | numeric   | non-unique | optional | normal   tumor   DCIS   metastasis.or.recurrence   after.treatment                 |                                                                                                  |
| treatment                | integer   | non-unique | optional | untreated   chemotherapy   hormone therapy   endocrine   chemotherapy.plus.hormone | based on observing whether tamoxifen, herceptin, and chemotherapy were administered to a patient |
| percent_normal_cells     | character | non-unique | optional | \d+[+-]?                                                                           | estimated percentage of normal cells                                                             |
| percent_stromal_cells    | character | non-unique | optional | \d+[+-]?                                                                           | estimated percentage of stromal cells                                                            |
| percent_tumor_cells      | character | non-unique | optional | \d+[+-]?                                                                           | estimated percentage of tumor cells                                                              |
| batch                    | character | non-unique | optional | *                                                                                  | batch variable - hybridization date when Affymetrix CEL files are available.                     |

|                            |           |            |          |   |                                                            |
|----------------------------|-----------|------------|----------|---|------------------------------------------------------------|
| uncurated_author_meta data | character | non-unique | optional | * | original uncurated data, with each field separated by ///. |
| duplicates                 | character | non-unique | optional | * | list of sample replicates across all expression sets       |

### Curated Clinical Annotations in MetaGxOvarian

| col.name          | var.class | uniqueness | requiredness | allowedvalues                                                       | description                                                                                                                                                                                                           |
|-------------------|-----------|------------|--------------|---------------------------------------------------------------------|-----------------------------------------------------------------------------------------------------------------------------------------------------------------------------------------------------------------------|
| sample_name       | character | unique     | required     | *                                                                   | primary sample identifier                                                                                                                                                                                             |
| alt_sample_name   | character | unique     | optional     | *                                                                   | if another identifier is used, for example in supplemental tables                                                                                                                                                     |
| unique_patient_ID | character | non-unique | optional     | *                                                                   | Use this column if there are technical replicates. If this column contains non-unique entries, expression values of those arrays will eventually be averaged.                                                         |
| sample_type       | character | non-unique | required     | tumor metastatic borderline benign adjacent normal healthy cellline | healthy should be only from individuals without cancer, adjacentnormal from individuals with cancer, metastatic for non-primary tumors, borderline includes both borderline and LMP tumors, benign for benign tumors. |
| histological_type | character | non-unique | optional     | ser endo clearcell mucinous undifferentiated other mix              | ser=serous;endo=endometrioid;clearcell=mixture of ser+endo. Other includes sarcomatoid, endometrioid, papillary serous, unspecified adenocarcinoma, dysgerminoma                                                      |
| primarysite       | character | non-unique | optional     | ov ft other                                                         | ov=ovary;ft=fallopian tube                                                                                                                                                                                            |
| arrayedsite       | character | non-unique | optional     | ov ft other                                                         | ov=ovary;"ft=fallopian tube"                                                                                                                                                                                          |
| summarygrade      | character | non-unique | optional     | low high                                                            | low = 1, 2, LMP. High= 3,4,23                                                                                                                                                                                         |
| summarystage      | character | non-unique | optional     | early late                                                          | early = 1,2, 12. late=3,4,23,34                                                                                                                                                                                       |



|                                     |           |            |          |                                                               |                                                                                                        |
|-------------------------------------|-----------|------------|----------|---------------------------------------------------------------|--------------------------------------------------------------------------------------------------------|
| tumorstage                          | character | non-unique | optional | 1 2 3 4                                                       | Group Stage (I-IV, translated to 1-4 for R usage.). If multiple stages given (eg 34), use the highest. |
| substage                            | character | non-unique | optional | a b c d                                                       | substage (abcd). For cases like ab, bc, use highest given                                              |
| grade                               | integer   | non-unique | optional | 0 1 2 3 4                                                     | G (0-4): If multiple given, ie 12, 23, use highest given                                               |
| age_at_initial_pathologic_diagnosis | integer   | non-unique | optional | [1-9][0-9]                                                    | in years                                                                                               |
| pltx                                | character | non-unique | optional | [yn]                                                          | patient treated with platin                                                                            |
| tax                                 | character | non-unique | optional | [yn]                                                          | patient treated with taxol                                                                             |
| neo                                 | character | non-unique | optional | [yn]                                                          | neoadjuvant treatment                                                                                  |
| days_to_tumor_recurrence            | numeric   | non-unique | optional | decimal                                                       | time to recurrence or last follow-up in days                                                           |
| recurrence_status                   | character | non-unique | optional | recurrence norecurrence                                       | recurrence censoring variable                                                                          |
| days_to_death                       | numeric   | non-unique | optional | decimal                                                       | time to death or last follow-up in days                                                                |
| vital_status                        | character | non-unique | optional | living deceased                                               | Overall survival censoring variable                                                                    |
| os_binary                           | character | non-unique | optional | short long                                                    | dichotomized overall survival variable (short, long)                                                   |
| relapse_binary                      | character | non-unique | optional | short long                                                    | dichotomized relapse variable (short, long)                                                            |
| site_of_tumor_first_recurrence      | character | non-unique | optional | metastasis local regional none localoregional_plus_metastatic | none for no recurrence, na for unknown                                                                 |
| primary_therapy_outcome_success     | character | non-unique | optional | completeresponse partialresponse progressive                  | response to any kind of therapy                                                                        |

|                               |           |            |          |                             |                                                                                |
|-------------------------------|-----------|------------|----------|-----------------------------|--------------------------------------------------------------------------------|
|                               |           |            |          | disease   stabledi<br>sease |                                                                                |
| debulking                     | character | non-unique | optional | optimal   subopti<br>mal    | amount of residual disease (optimal = <1cm,<br>suboptimal=>1cm)                |
| percent_norm<br>al_cells      | character | non-unique | optional | \d+[+-]?                    | estimated percentage of normal cells                                           |
| percent_strom<br>al_cells     | character | non-unique | optional | \d+[+-]?                    | estimated percentage of stromal cells                                          |
| percent_tumo<br>r_cells       | character | non-unique | optional | \d+[+-]?                    | estimated percentage of tumor cells                                            |
| batch                         | character | non-unique | optional | *                           | batch variable - hybridization date when<br>Affymetrix CEL files are available |
| flag                          | character | non-unique | optional | *                           | Free-form flag to annotate the sample.                                         |
| flag_notes                    | character | non-unique | optional | *                           | Notes associated with the flag.                                                |
| uncurated_aut<br>hor_metadata | character | non-unique | optional | *                           | original uncurated data, with each field<br>separated by ///.                  |
| duplicates                    | character | non-unique | optional | *                           | list of sample replicates across all expression<br>sets                        |

### Curated Clinical Annotations in MetaGxPancreas

| col.name    | var.class | uniqueness | requiredness | allowedvalues   | description                                                                                                                                                                                                                      |
|-------------|-----------|------------|--------------|-----------------|----------------------------------------------------------------------------------------------------------------------------------------------------------------------------------------------------------------------------------|
| sample_name | character | unique     | required     | *               | primary sample identifier                                                                                                                                                                                                        |
| T           | integer   | non-unique | optional     | 1 2 3 4         | T (1-4): size in TNM staging: see<br><a href="http://www.cancer.gov/cancertopics/pdq/treatment/breast/healthprofessional/page3">http://www.cancer.gov/cancertopics/<br/>pdq/treatment/breast/healthprofessio<br/>nal/page3</a> . |
| N           | integer   | non-unique | optional     | Nx  N0}N1 N2 N3 | Standard N system used in TNM, i.e Nx<br>(cannot be assessed)   N0 no regional<br>lymph node metastasis   N1                                                                                                                     |

|                     |           |            |          |                 |                                                                                                           |
|---------------------|-----------|------------|----------|-----------------|-----------------------------------------------------------------------------------------------------------|
|                     |           |            |          |                 | metastasis present   N2 tumor spread to extent between N1 and N3   N3 tumor spread to distant lymph nodes |
| grade               | integer   | non-unique | optional | G1 G2 G3        | G1 low grade   G2 intermediate grade   G3 high grade                                                      |
| days_to_death       | integer   | non-unique | optional | decimal         | This is a potentially censored time from diagnosis to death.                                              |
| vital_status        | character | non-unique | optional | living deceased | overall survival censoring variable                                                                       |
| unique_patient_id   | character | unique     | optional | *               | additional sample identification info from the dataset                                                    |
| sex                 | character | non-unique | optional | male femal      | The patient's sex                                                                                         |
| M                   | character | non-unique | optional | Mx M0 M1        | distant metastases info, Mx is unknown, M0 implies cancer has not spread and M1 implies cancer has spread |
| sample_type         | character | non-unique | required | tumour          | All samples were from primary PDAC tumors                                                                 |
| geo_accession       | character | non-unique | optional | *               | patient's geo accession number                                                                            |
| pTNM                | character | non-unique | optional | R0 R1           | Resected margin status, R0 no cancer cells at margin, R1 cancer cells at marging                          |
| cellularity         | integer   | non-unique | optional | 0-100           | percent cellularity                                                                                       |
| age                 | integer   | non-unique | optional | [1-9][0-9]      | The patient's age in years                                                                                |
| age at Dx (surgery) | integer   | non-unique | optional | [1-9][0-9]      | The patient's age in years at the time of surgery                                                         |

## Supplementary File S8

### MetaGx Signature

|    | Symbol   | Direction | Entrez ID | Ensemble ID     | Description                                            |
|----|----------|-----------|-----------|-----------------|--------------------------------------------------------|
| 1  | CRABP2   | 1         | 1382      | ENSG00000143320 | cellular retinoic acid binding protein 2               |
| 2  | DPP4     | 1         | 1803      | ENSG00000197635 | dipeptidyl peptidase 4                                 |
| 3  | EGFR     | 1         | 1956      | ENSG00000146648 | epidermal growth factor receptor                       |
| 4  | LOXL2    | 1         | 4017      | ENSG00000134013 | lysyl oxidase like 2                                   |
| 5  | OPRM1    | 1         | 4988      | ENSG00000112038 | opioid receptor mu 1                                   |
| 6  | SERPINB2 | 1         | 5055      | ENSG00000197632 | serpin family B member 2                               |
| 7  | PLAU     | 1         | 5328      | ENSG00000122861 | plasminogen activator, urokinase                       |
| 8  | PPEF1    | 1         | 5475      | ENSG00000086717 | protein phosphatase with EF-hand domain 1              |
| 9  | STK3     | 1         | 6788      | ENSG00000104375 | serine/threonine kinase 3                              |
| 10 | NAE1     | 1         | 8883      | ENSG00000159593 | NEDD8 activating enzyme E1 subunit 1                   |
| 11 | ACTN4    | 1         | 81        | ENSG00000130402 | actinin alpha 4                                        |
| 12 | CACNB3   | 1         | 784       | ENSG00000167535 | calcium voltage-gated channel auxiliary subunit beta 3 |
| 13 | CBFB     | 1         | 865       | ENSG00000067955 | core-binding factor beta subunit                       |
| 14 | IMPDH1   | 1         | 3614      | ENSG00000106348 | inosine monophosphate dehydrogenase 1                  |
| 15 | IRF3     | 1         | 3661      | ENSG00000126456 | interferon regulatory factor 3                         |
| 16 | KIF11    | 1         | 3832      | ENSG00000138160 | kinesin family member 11                               |
| 17 | TERF2    | 1         | 7014      | ENSG00000132604 | telomeric repeat binding factor 2                      |
| 18 | TGFBI    | 1         | 7045      | ENSG00000120708 | transforming growth factor beta induced                |
| 19 | TPD52L2  | 1         | 7165      | ENSG00000101150 | tumor protein D52 like 2                               |
| 20 | MSC      | 1         | 9242      | ENSG00000178860 | musculin                                               |
| 21 | PWP1     | 1         | 11137     | ENSG00000136045 | PWP1 homolog, endonuclein                              |
| 22 | CLDN4    | 1         | 1364      | ENSG00000189143 | claudin 4                                              |
| 23 | CSE1L    | 1         | 1434      | ENSG00000124207 | chromosome segregation 1 like                          |

|    |          |    |        |                 |                                                                  |
|----|----------|----|--------|-----------------|------------------------------------------------------------------|
| 24 | NID2     | 1  | 22795  | ENSG00000087303 | nidogen 2                                                        |
| 25 | RALY     | 1  | 22913  | ENSG00000125970 | RALY heterogeneous nuclear ribonucleoprotein                     |
| 26 | CDK19    | 1  | 23097  | ENSG00000155111 | cyclin dependent kinase 19                                       |
| 27 | ACKR3    | 1  | 57007  | ENSG00000144476 | atypical chemokine receptor 3                                    |
| 28 | TEX261   | 1  | 113419 | ENSG00000144043 | testis expressed 261                                             |
| 29 | LATS2    | 1  | 26524  | ENSG00000150457 | large tumor suppressor kinase 2                                  |
| 30 | REX1BD   | 1  | 55049  | ENSG00000006015 | required for excision 1-B domain containing                      |
| 31 | DARS2    | 1  | 55157  | ENSG00000117593 | aspartyl-tRNA synthetase 2, mitochondrial                        |
| 32 | UTP6     | 1  | 55813  | ENSG00000108651 | UTP6, small subunit processome component                         |
| 33 | CAMK1D   | 1  | 57118  | ENSG00000183049 | calcium/calmodulin dependent protein kinase ID                   |
| 34 | SIPA1L2  | 1  | 57568  | ENSG00000116991 | signal induced proliferation associated 1 like 2                 |
| 35 | ARHGAP21 | 1  | 57584  | ENSG00000107863 | Rho GTPase activating protein 21                                 |
| 36 | COP1     | 1  | 64326  | ENSG00000143207 | COP1, E3 ubiquitin ligase                                        |
| 37 | C12orf49 | 1  | 79794  | ENSG00000111412 | chromosome 12 open reading frame 49                              |
| 38 | KATNAL1  | 1  | 84056  | ENSG00000102781 | katanin catalytic subunit A1 like 1                              |
| 39 | ZFAND2A  | 1  | 90637  | ENSG00000178381 | zinc finger AN1-type containing 2A                               |
| 40 | MYADM    | 1  | 91663  | ENSG00000179820 | myeloid associated differentiation marker                        |
| 41 | CMBL     | 1  | 134147 | ENSG00000164237 | carboxymethylenebutenolidase homolog                             |
| 42 | DDB2     | -1 | 1643   | ENSG00000134574 | damage specific DNA binding protein 2                            |
| 43 | RARRES3  | -1 | 5920   | ENSG00000133321 | retinoic acid receptor responder 3                               |
| 44 | TNFRSF18 | -1 | 8784   | ENSG00000186891 | TNF receptor superfamily member 18                               |
| 45 | GSTZ1    | -1 | 2954   | ENSG00000100577 | glutathione S-transferase zeta 1                                 |
| 46 | MOCS1    | -1 | 4337   | ENSG00000124615 | molybdenum cofactor synthesis 1                                  |
| 47 | ZNF204P  | -1 | 7754   | #N/A            | zinc finger protein 204, pseudogene                              |
| 48 | FAM189A2 | -1 | 9413   | ENSG00000135063 | family with sequence similarity 189 member A2                    |
| 49 | ZSCAN32  | -1 | 54925  | ENSG00000140987 | zinc finger and SCAN domain containing 32                        |
| 50 | CDC37L1  | -1 | 55664  | ENSG00000106993 | cell division cycle 37 like 1                                    |
| 51 | MREG     | -1 | 55686  | ENSG00000118242 | melanoregulin                                                    |
| 52 | CAMSAP3  | -1 | 57662  | ENSG00000076826 | calmodulin regulated spectrin associated protein family member 3 |

|    |       |    |       |                 |                             |
|----|-------|----|-------|-----------------|-----------------------------|
| 53 | MYLK3 | -1 | 91807 | ENSG00000140795 | myosin light chain kinase 3 |
|----|-------|----|-------|-----------------|-----------------------------|

### Plos One 13-Gene Signature

|    | Symbol    | Direction | Entrez ID | Ensemble ID     | Description                                              |
|----|-----------|-----------|-----------|-----------------|----------------------------------------------------------|
| 1  | CCDC88C   | 1         | 440193    | ENSG00000015133 | coiled-coil domain containing 88C                        |
| 2  | CD200R1   | 1         | 131450    | ENSG00000163606 | CD200 receptor 1                                         |
| 3  | CDH5      | 1         | 1003      | ENSG00000179776 | cadherin 5                                               |
| 4  | CUL3      | 1         | 8452      | ENSG00000036257 | cullin 3                                                 |
| 5  | RIMKLB    | 1         | 57494     | ENSG00000166532 | ribosomal modification protein rimK like family member B |
| 6  | ELAVL1    | 1         | 1994      | ENSG00000066044 | ELAV like RNA binding protein 1                          |
| 7  | LINC01341 | 1         | 149134    | #N/A            | long intergenic non-protein coding RNA 1341              |
| 8  | MDM2      | 1         | 4193      | ENSG00000135679 | MDM2 proto-oncogene                                      |
| 9  | MS4A3     | 1         | 932       | ENSG00000149516 | membrane spanning 4-domains A3                           |
| 10 | PLCG1     | 1         | 5335      | ENSG00000124181 | phospholipase C gamma 1                                  |
| 11 | PRKCSH    | 1         | 5589      | ENSG00000130175 | protein kinase C substrate 80K-H                         |
| 12 | TGFA      | 1         | 7039      | ENSG00000163235 | transforming growth factor alpha                         |
| 13 | ULBP3     | 1         | 79465     | ENSG00000131019 | UL16 binding protein 3                                   |

### Genome Medicine Signature

|   | Symbol  | Direction | Entrez ID | Ensemble ID     | Description                                                      |
|---|---------|-----------|-----------|-----------------|------------------------------------------------------------------|
| 1 | KIF14   | 1         | 9928      | ENSG00000118193 | kinesin family member 14                                         |
| 2 | CNNM3   | -1        | 26505     | ENSG00000168763 | cyclin and CBS domain divalent metal cation transport mediator 3 |
| 3 | IGF2BP2 | 1         | 10644     | ENSG00000073792 | insulin like growth factor 2 mRNA binding protein 2              |
| 4 | TMEM26  | -1        | 219623    | ENSG00000196932 | transmembrane protein 26                                         |

|    |           |    |        |                 |                                                            |
|----|-----------|----|--------|-----------------|------------------------------------------------------------|
| 5  | ARRB1     | 1  | 408    | ENSG00000137486 | arrestin beta 1                                            |
| 6  | NPLOC4    | 1  | 55666  | ENSG00000182446 | NPL4 homolog, ubiquitin recognition factor                 |
| 7  | CIT       | 1  | 11113  | ENSG00000122966 | citron rho-interacting serine/threonine kinase             |
| 8  | RFX8      | 1  | 731220 | ENSG00000196460 | RFX family member 8, lacking RFX DNA binding domain        |
| 9  | SSX3      | 1  | 10214  | ENSG00000165584 | SSX family member 3                                        |
| 10 | CDC45     | 1  | 8318   | ENSG00000093009 | cell division cycle 45                                     |
| 11 | PXN       | 1  | 5829   | ENSG00000089159 | paxillin                                                   |
| 12 | GRPEL2    | 1  | 134266 | ENSG00000164284 | GrpE like 2, mitochondrial                                 |
| 13 | ITGA5     | 1  | 3678   | ENSG00000161638 | integrin subunit alpha 5                                   |
| 14 | ADAMTS14  | 1  | 140766 | ENSG00000138316 | ADAM metalloproteinase with thrombospondin type 1 motif 14 |
| 15 | PHLDA1    | 1  | 22822  | ENSG00000139289 | pleckstrin homology like domain family A member 1          |
| 16 | RPSAP58   | 1  | 388524 | #N/A            | ribosomal protein SA pseudogene 58                         |
| 17 | SEMA3A    | 1  | 10371  | ENSG00000075213 | semaphorin 3A                                              |
| 18 | NOSTRIN   | 1  | 115677 | ENSG00000163072 | nitric oxide synthase trafficking                          |
| 19 | ADM       | -1 | 133    | ENSG00000148926 | adrenomedullin                                             |
| 20 | GTF2IRD2B | -1 | 389524 | ENSG00000174428 | GTF2I repeat domain containing 2B                          |
| 21 | ITGBL1    | 1  | 9358   | ENSG00000198542 | integrin subunit beta like 1                               |
| 22 | B3GNT1    | -1 | #N/A   | #N/A            | #N/A                                                       |
| 23 | QDPR      | 1  | 5860   | ENSG00000151552 | quinoid dihydropteridine reductase                         |
| 24 | KIF4A     | 1  | 24137  | ENSG00000090889 | kinesin family member 4A                                   |
| 25 | BLM       | 1  | 641    | ENSG00000197299 | Bloom syndrome RecQ like helicase                          |
| 26 | ZNF471    | 1  | 57573  | ENSG00000196263 | zinc finger protein 471                                    |
| 27 | CADPS     | 1  | 8618   | ENSG00000163618 | calcium dependent secretion activator                      |
| 28 | SLC20A1   | 1  | 6574   | ENSG00000144136 | solute carrier family 20 member 1                          |
| 29 | SKA3      | 1  | 221150 | ENSG00000165480 | spindle and kinetochore associated complex subunit 3       |
| 30 | CKAP2L    | 1  | 150468 | ENSG00000169607 | cytoskeleton associated protein 2 like                     |
| 31 | RPL39L    | 1  | 116832 | ENSG00000163923 | ribosomal protein L39 like                                 |
| 32 | ICOSLG    | 1  | 23308  | ENSG00000160223 | inducible T cell costimulator ligand                       |
| 33 | CDK2AP1   | 1  | 8099   | ENSG00000111328 | cyclin dependent kinase 2 associated protein 1             |

|    |          |   |        |                 |                                                             |
|----|----------|---|--------|-----------------|-------------------------------------------------------------|
| 34 | IL20RB   | 1 | 53833  | ENSG00000174564 | interleukin 20 receptor subunit beta                        |
| 35 | EIF4E3   | 1 | 317649 | ENSG00000163412 | eukaryotic translation initiation factor 4E family member 3 |
| 36 | GTF2IRD2 | 1 | 84163  | ENSG00000196275 | GTF2I repeat domain containing 2                            |

## Oncogene Signature

|    | Symbol   | Direction | Entrez ID | Ensemble ID     | Description                                  |
|----|----------|-----------|-----------|-----------------|----------------------------------------------|
| 1  | COL5A2   | 1         | 1290      | ENSG00000204262 | collagen type V alpha 2 chain                |
| 2  | ECM1     | 1         | 1893      | ENSG00000143369 | extracellular matrix protein 1               |
| 3  | NREP     | 1         | 9315      | ENSG00000134986 | neuronal regeneration related protein        |
| 4  | MPP3     | 1         | 4356      | ENSG00000161647 | membrane palmitoylated protein 3             |
| 5  | PXDN     | 1         | 7837      | ENSG00000130508 | peroxidasin                                  |
| 6  | ANXA8    | 1         | 653145    | ENSG00000265190 | annexin A8                                   |
| 7  | CLOCK    | 1         | 9575      | ENSG00000134852 | clock circadian regulator                    |
| 8  | MYL9     | 1         | 10398     | ENSG00000101335 | myosin light chain 9                         |
| 9  | LOC91316 | 1         | #N/A      | #N/A            | #N/A                                         |
| 10 | IGFBP5   | 1         | 3488      | ENSG00000115461 | insulin like growth factor binding protein 5 |
| 11 | BST2     | 1         | 684       | ENSG00000130303 | bone marrow stromal cell antigen 2           |
| 12 | PMP22    | 1         | 5376      | ENSG00000109099 | peripheral myelin protein 22                 |
| 13 | KIAA1641 | 1         | #N/A      | #N/A            | #N/A                                         |
| 14 | C2       | 1         | 717       | ENSG00000166278 | complement C2                                |
| 15 | CTSK     | 1         | 1513      | ENSG00000143387 | cathepsin K                                  |
| 16 | CSTB     | 1         | 1476      | ENSG00000160213 | cystatin B                                   |
| 17 | FBN1     | 1         | 2200      | ENSG00000166147 | fibrillin 1                                  |
| 18 | GBP1     | 1         | 2633      | ENSG00000117228 | guanylate binding protein 1                  |
| 19 | ARHGEF2  | 1         | 9181      | ENSG00000116584 | Rho/Rac guanine nucleotide exchange factor 2 |
| 20 | NDUFB7   | 1         | 4713      | ENSG00000099795 | NADH:ubiquinone oxidoreductase subunit B7    |
| 21 | RCN1     | 1         | 5954      | ENSG00000049449 | reticulocalbin 1                             |
| 22 | MSN      | 1         | 4478      | ENSG00000147065 | moesin                                       |



|    |            |    |       |                 |                                                                                          |
|----|------------|----|-------|-----------------|------------------------------------------------------------------------------------------|
| 23 | ALDOC      | 1  | 230   | ENSG00000109107 | aldolase, fructose-bisphosphate C                                                        |
| 24 | EPS8       | 1  | 2059  | ENSG00000151491 | epidermal growth factor receptor pathway substrate 8                                     |
| 25 | CLIC1      | 1  | 1192  | ENSG00000213719 | chloride intracellular channel 1                                                         |
| 26 | KLF5       | 1  | 688   | ENSG00000102554 | Kruppel like factor 5                                                                    |
| 27 | HIST2H2AA3 | 1  | #N/A  | #N/A            | #N/A                                                                                     |
| 28 | LAMA4      | 1  | 3910  | ENSG00000112769 | laminin subunit alpha 4                                                                  |
| 29 | C5         | -1 | 727   | ENSG00000106804 | complement C5                                                                            |
| 30 | BCAT1      | -1 | 586   | ENSG00000060982 | branched chain amino acid transaminase 1                                                 |
| 31 | SSFA2      | -1 | 6744  | ENSG00000138434 | sperm specific antigen 2                                                                 |
| 32 | LOXL1      | -1 | 4016  | ENSG00000129038 | lysyl oxidase like 1                                                                     |
| 33 | MT1X       | -1 | 4501  | ENSG00000187193 | metallothionein 1X                                                                       |
| 34 | ALDH1A1    | -1 | 216   | ENSG00000165092 | aldehyde dehydrogenase 1 family member A1                                                |
| 35 | ATP5S      | -1 | 27109 | ENSG00000125375 | ATP synthase, H <sup>+</sup> transporting, mitochondrial Fo complex subunit s (factor B) |
| 36 | LMF2       | -1 | 91289 | ENSG00000100258 | lipase maturation factor 2                                                               |
| 37 | EPHX2      | -1 | 2053  | ENSG00000120915 | epoxide hydrolase 2                                                                      |
| 38 | F11        | -1 | 2160  | ENSG00000088926 | coagulation factor XI                                                                    |
| 39 | CYBA       | -1 | 1535  | ENSG00000051523 | cytochrome b-245 alpha chain                                                             |

### Strat Signature

|   | Symbol   | Direction | Entrez ID | Ensemble ID     | Description                                                      |
|---|----------|-----------|-----------|-----------------|------------------------------------------------------------------|
| 1 | SIGLEC11 | 1         | 114132    | ENSG00000161640 | sialic acid binding Ig like lectin 11                            |
| 2 | KLF6     | 1         | 1316      | ENSG00000067082 | Kruppel like factor 6                                            |
| 3 | FOSB     | -1        | 2354      | ENSG00000125740 | FosB proto-oncogene, AP-1 transcription factor subunit           |
| 4 | ATP4A    | 1         | 495       | ENSG00000105675 | ATPase H <sup>+</sup> /K <sup>+</sup> transporting alpha subunit |
| 5 | NFKBIZ   | 1         | 64332     | ENSG00000144802 | NFKB inhibitor zeta                                              |
| 6 | GSG1     | -1        | 83445     | ENSG00000111305 | germ cell associated 1                                           |
